# Supplementary material for: Choline regulation of triglycerides synthesis through ubiquintination pathway in MAC-T cells
Source: PeerJ journal article supplement (doi:10.7717/peerj.16611), 2023-12-19
Supplement: original_data_of_blots.pdf [file original_data_of_blots.pdf]

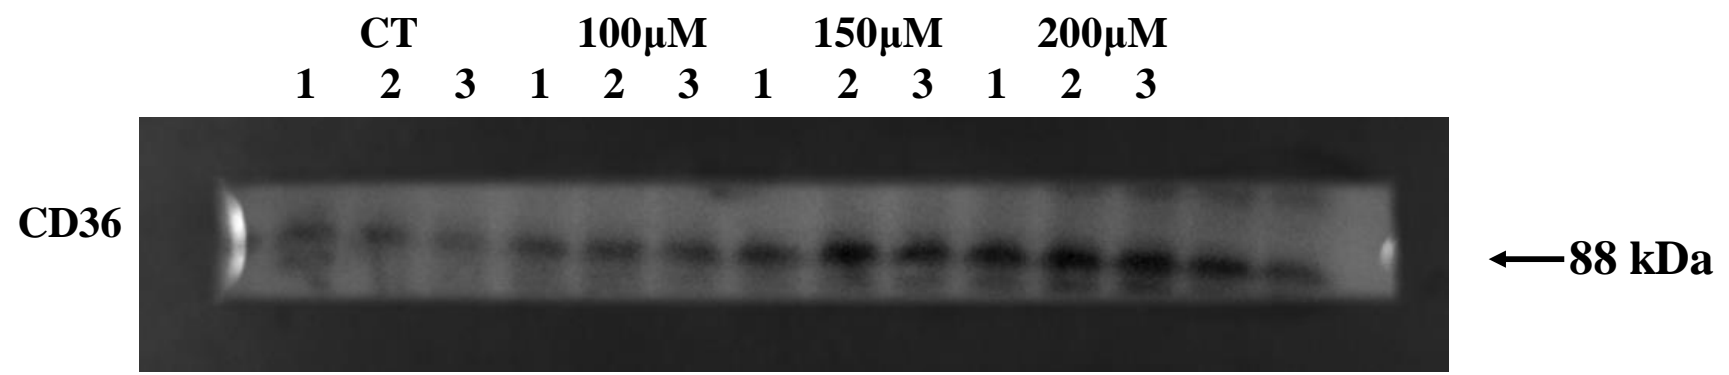

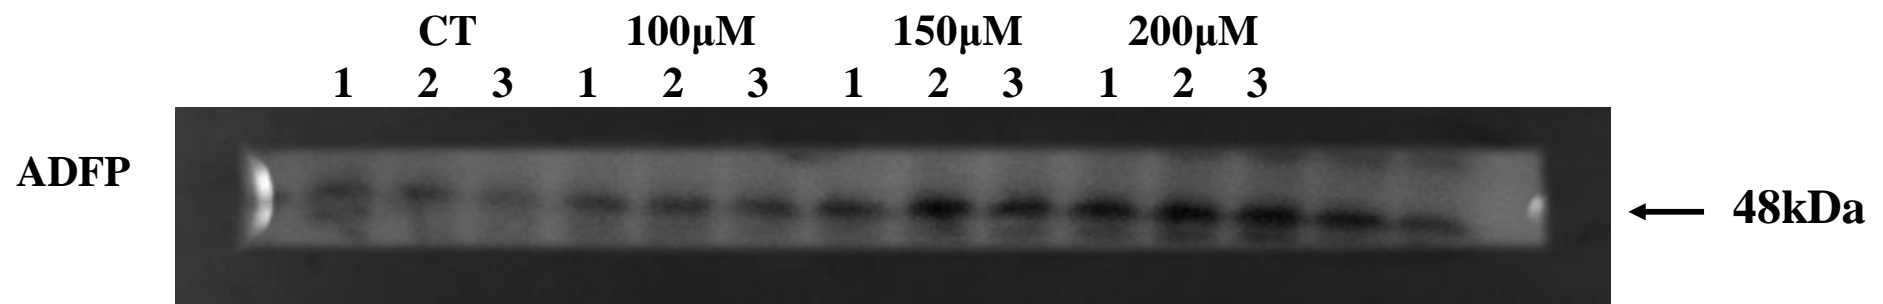

CT      100 $\mu$ M      150 $\mu$ M      200 $\mu$ M  
1 2 3    1 2 3    1 2 3    1 2 3

UB

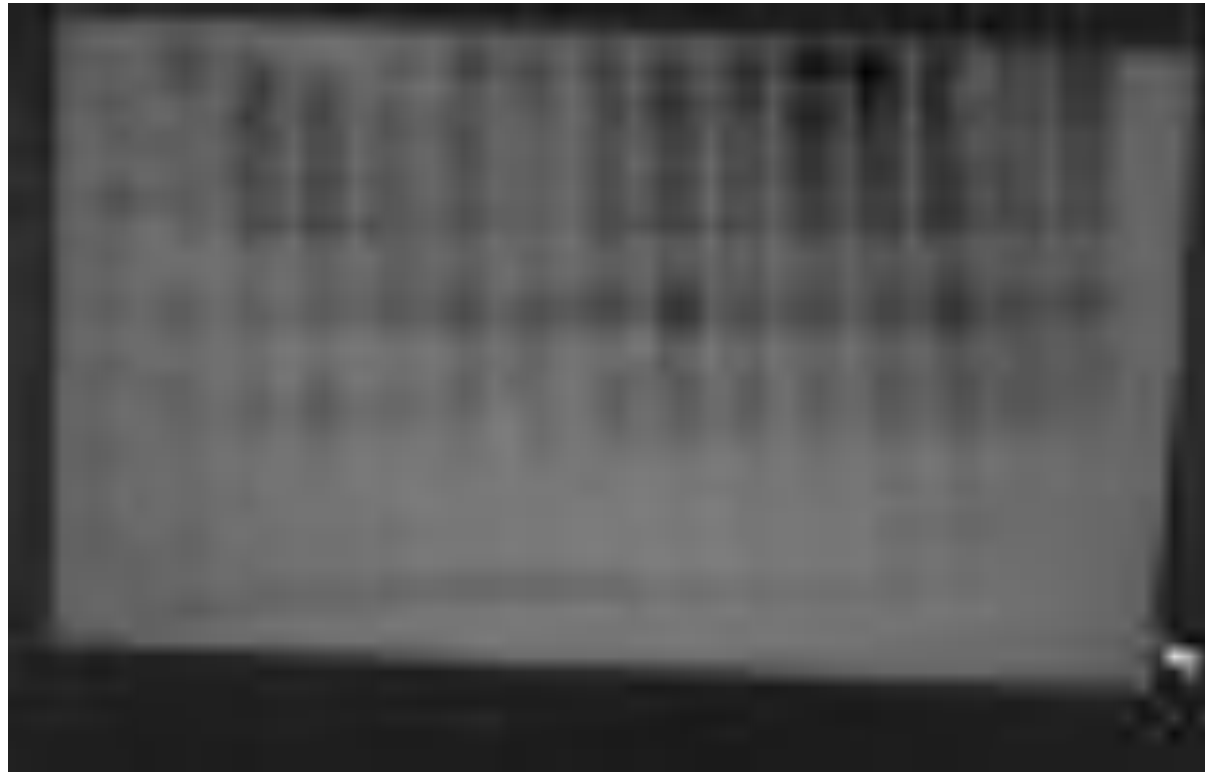

CT                    100 $\mu$ M                    150 $\mu$ M                    200 $\mu$ M  
1 2 3                    1 2 3                    1 2 3                    1 2 3

$\beta$ -actin

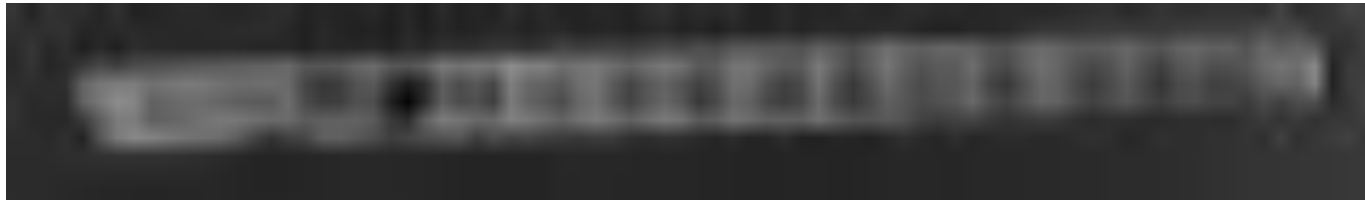

← 42kDa
